# Supplementary material for: Carbon dots for lysosome targeting and imaging of lysosomal pH and Cys/Hcy in living cells
Source: Royal Society of Chemistry journal article supplement (doi:10.1039/d0nr02083d), 2020-01-01
Supplement: d0nr02083d1.pdf [file d0nr02083d1.pdf]

## Supplementary Information

### Carbon dots for Lysosome Targeting and Imaging of Lysosomal pH and Cys/Hcy in Living Cells

Qiaoling Liu, \* Xiuyun Niu, Yan Zhang, Ying Zhao, Kaixin Xie, Boru Yang, Qing He, Shiyu Lv, Lin Li

*Department of Chemistry, Taiyuan Normal University, Jinzhong 030619, P. R. China.*

\*E-mail: [liuqiaoling@tynu.edu.cn](mailto:liuqiaoling@tynu.edu.cn), Tel: +86-351-2886580;

\*E-mail: [lilin@tynu.edu.cn](mailto:lilin@tynu.edu.cn), Tel: +86-351-2886580.

### Contents

1. Determination of  $pK_a$
2. Determination of fluorescence quantum yield
3. Supplementary figures
4. Synthesis of the styrylcyanine dye
5.  $^1\text{H}$  NMR spectra
6. References

## 1. Determination of $pK_a$

$pK_a$  can be calculated by using the Henderson-Hasselbalch equation:

$$pH = pK_a + \log \left( \frac{[\text{conjugate base}]}{[\text{weak acid}]} \right)$$

$$pH = pK_a + \log \left( \frac{[A^-]}{[HA]} \right)$$

At half the equivalence point,

$$pH = pK_a \quad (1)$$

## 2. Determination of fluorescence quantum yield

Fluorescence quantum yield was measured by a standard method in air-equilibrated sample at room temperature. The fluorescence quantum yield was determined by using Rhodamine B ( $\Phi=0.31$  in water) as reference.<sup>1, 2</sup>

$$\Phi_{\text{sam}} = \Phi_{\text{ref}} \frac{I_{\text{sam}}}{I_{\text{ref}}} \cdot \frac{A_{\text{ref}}}{A_{\text{sam}}} \cdot \left( \frac{n_{\text{sam}}}{n_{\text{ref}}} \right)^2 \quad (2)$$

Where  $\Phi$  is the fluorescence quantum yield,  $I$  is the integrated emission intensity,  $A$  is the absorbance, and  $n$  is the refractive index. The subscripts  $_{\text{sam}}$  and  $_{\text{ref}}$  stand for sample and reference, respectively. Herein, the SCy-CDs and Rhodamine B were dissolved in ultrapure water ( $n = 1.33$ ) and excited under 420 nm and kept the absorbance below 0.05.

## 3. Supplementary figures

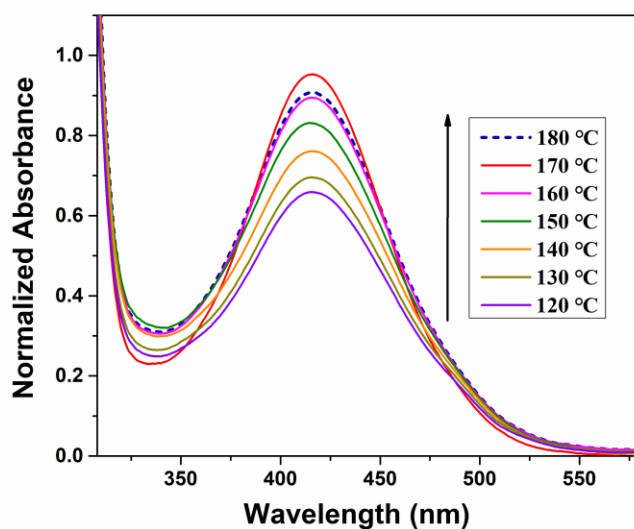

Fig.S1. The absorption spectra of the o-CDs at the different reaction temperatures.

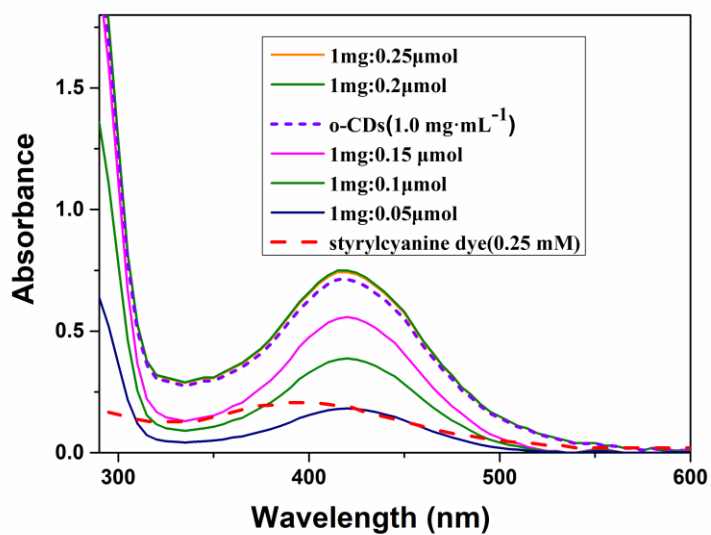

Fig.S2 The absorption spectra of o-CDs and styrylcyanine at different ratio by ethanol reflux.

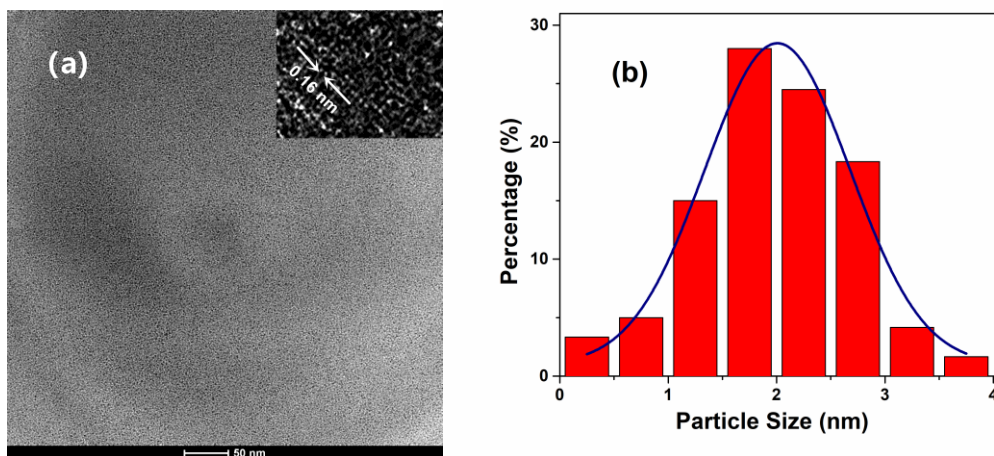

Fig.S3 TEM image of the o-CDs (inset: corresponding HRTEM image). (b) The size distribution of the o-CDs.

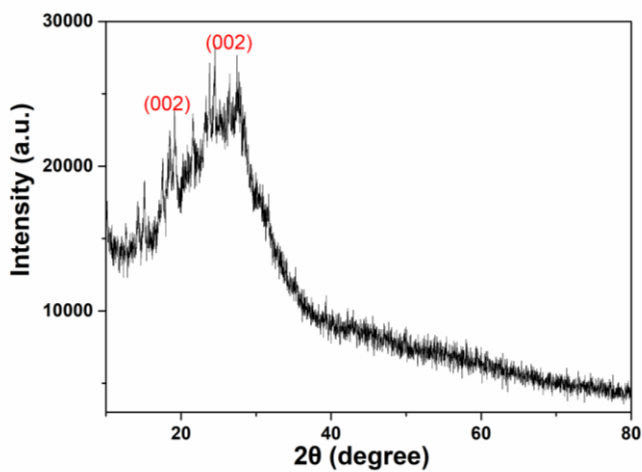

Fig. S4 XRD diffraction pattern of the Scy-CDs.

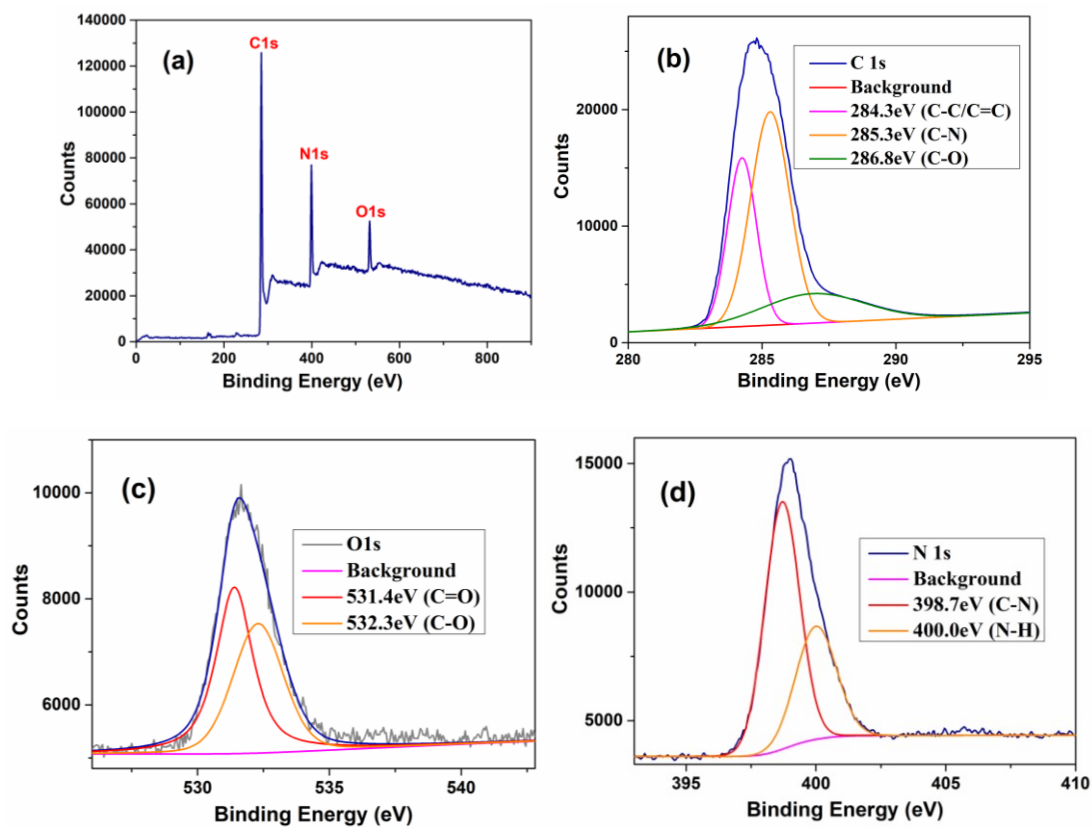

Fig.S5 (a) The full scan XPS of o-CDs. High resolution XPS of C 1s (b), O 1s (c) and N 1s (d).

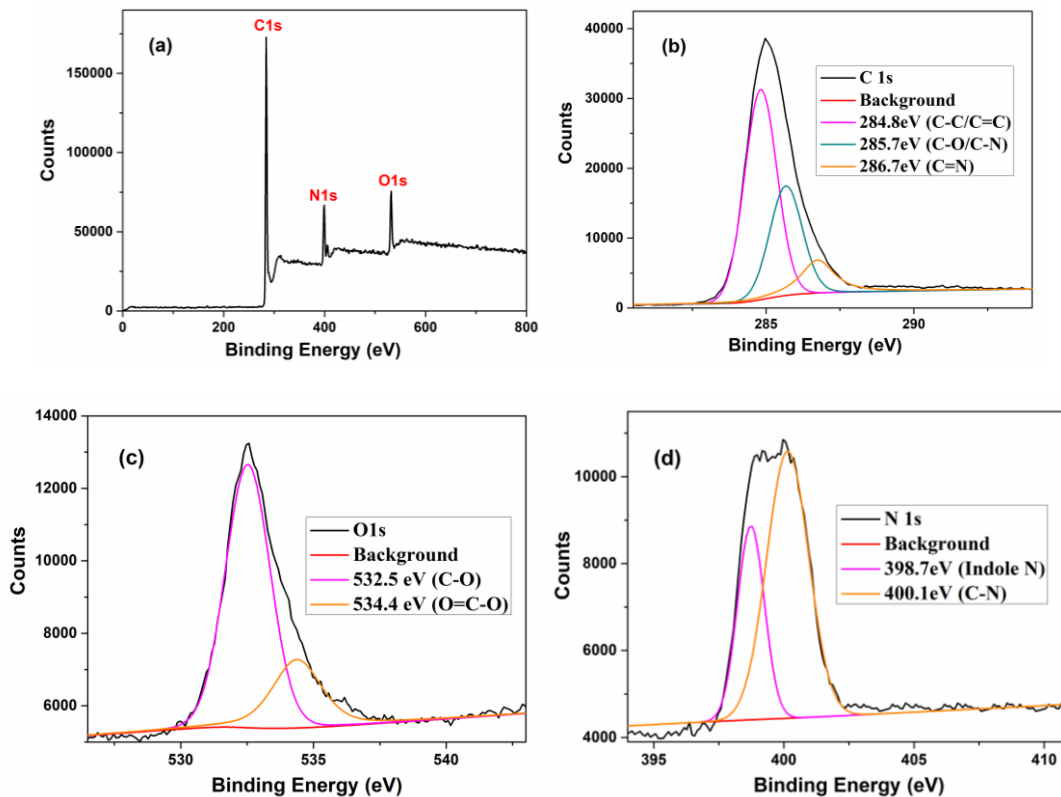

Fig.S6 (a) The full scan XPS of Scy-CDs. High resolution XPS of C 1s (b), O 1s (c) and N 1s (d).

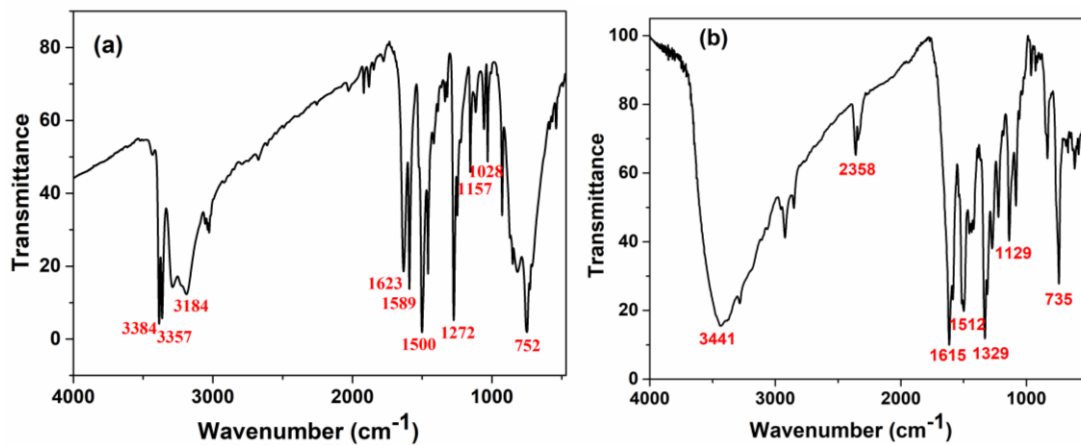

Fig.S7 Fourier transformed infrared spectra of o-CDs (a) and Scy-CDs (b).

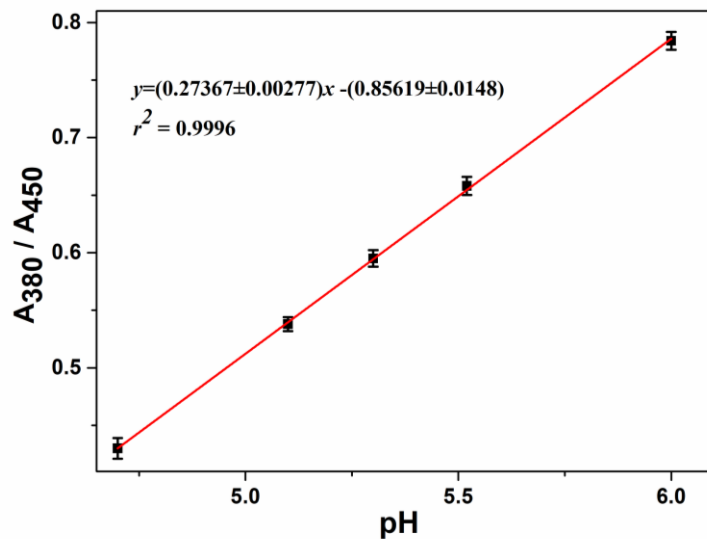

Fig. S8 The linear region between the ratiometric absorbance ( $A_{380} / A_{450}$ ) and pH in the range of 4.7-6.0.

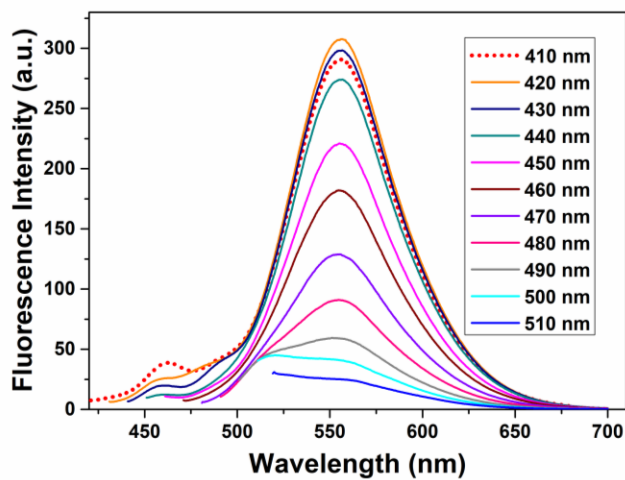

Fig. S9 The fluorescence emission spectra of the Scy-CDs with different excitation wavelengths.

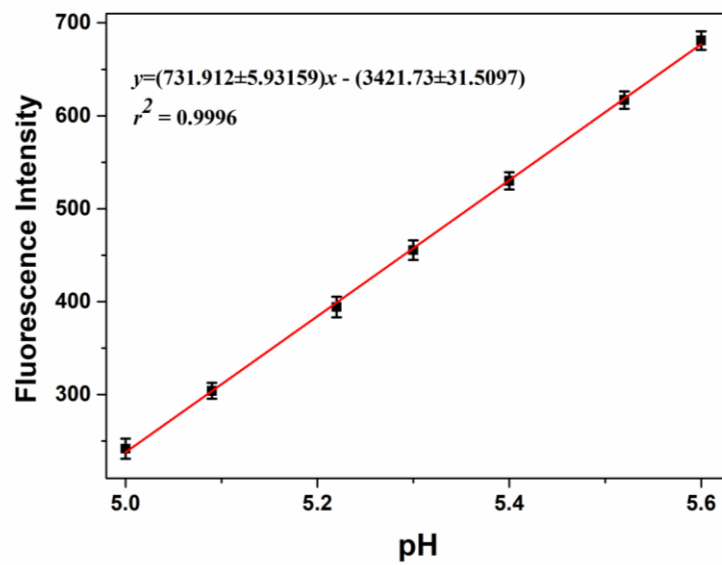

Fig.S10 The linear region between the fluorescence intensity of Scy-CDs at 556 nm and pH in the range of 5.0-5.6.



Scy-CDs-H<sup>+</sup>-Cys

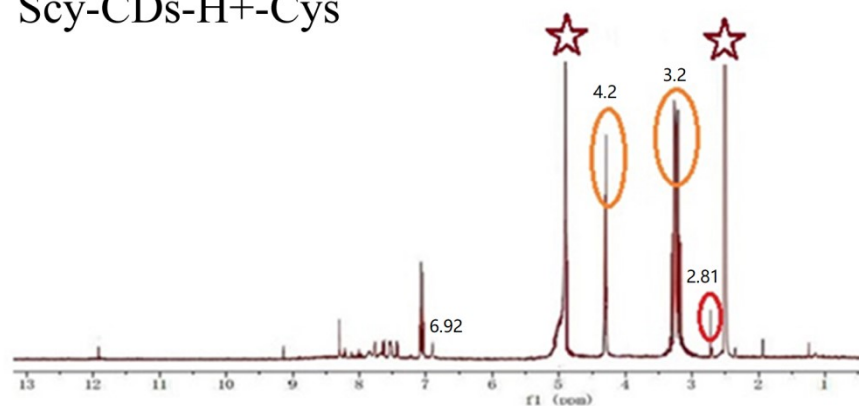

Scy-CDs-H<sup>+</sup>

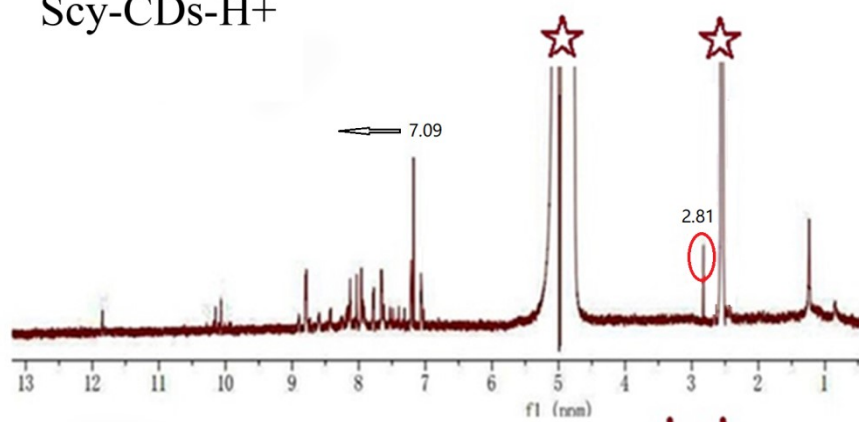

Scy-CDs

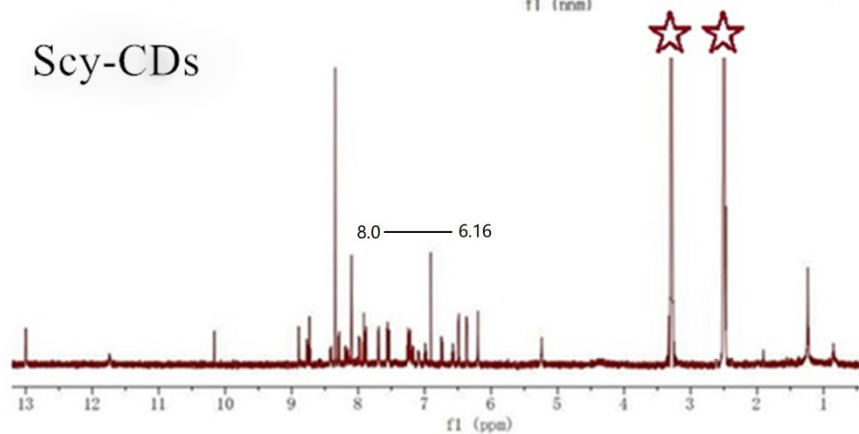

Fig. S11 <sup>1</sup>H NMR spectra of Scy-CDs, Scy-CDs-H<sup>+</sup> and Scy-CDs-H<sup>+</sup>-Cys complex in DMSO-*d*<sub>6</sub>. The water and solvent peaks are marked with asterisks.

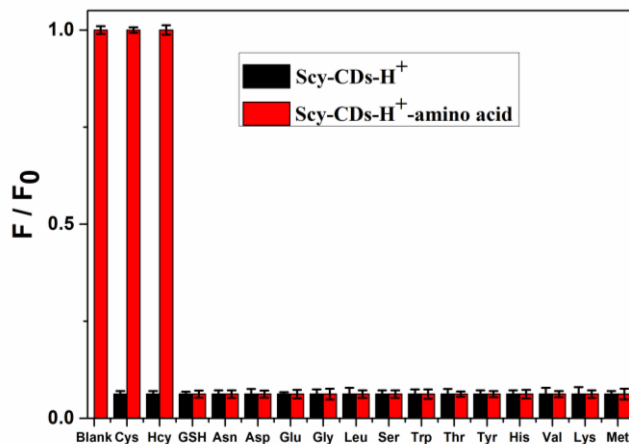

Fig.S12 Relative fluorescence intensity of the Scy-CDs (0.04 mg/mL) in the presence of 120  $\mu\text{M}$   $\text{H}^+$ , and then addition of different amino acids (120 $\mu\text{M}$ ) in aqueous solution, where  $F_0$  and  $F$  are the fluorescence intensities of the Scy-CDs in the absence and the presence of  $\text{H}^+$  or ( $\text{H}^+$  and amino acids), respectively. The excitation wavelength is 450 nm.

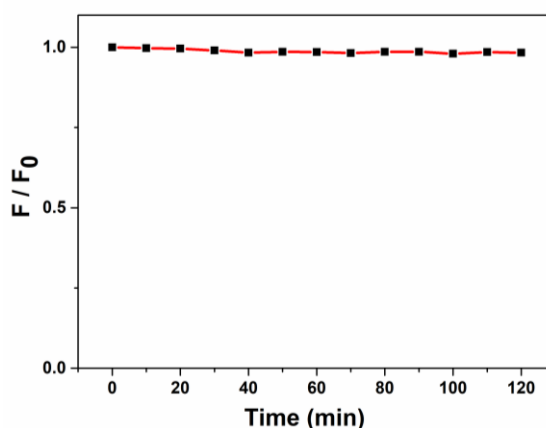

Fig. S13 Photostability of the Scy-CDs as a function of the continuous ultraviolet light at 365 nm for 120 min.

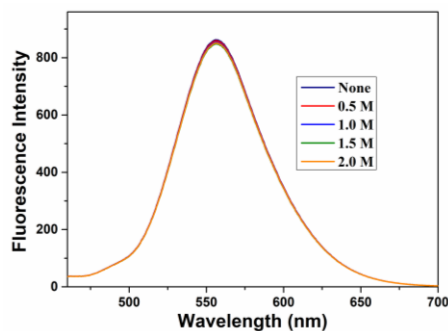

Fig. S14 The effects of the different ionic strengths (0.0-2.0 M KCl) on the fluorescence emission spectra of the Scy-CDs (0.04 mg/mL) at 420 nm excitation wavelength.

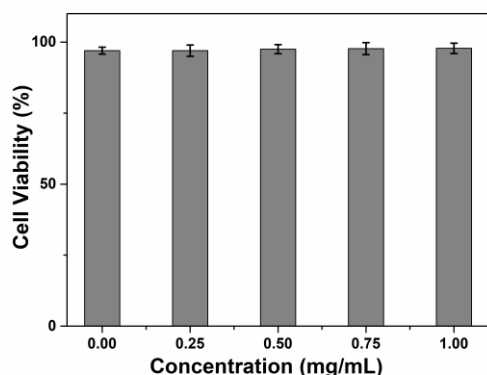

Fig. S15 Cytotoxic assay of the different concentrations of Scy-CDs on Hep-2 Cells.

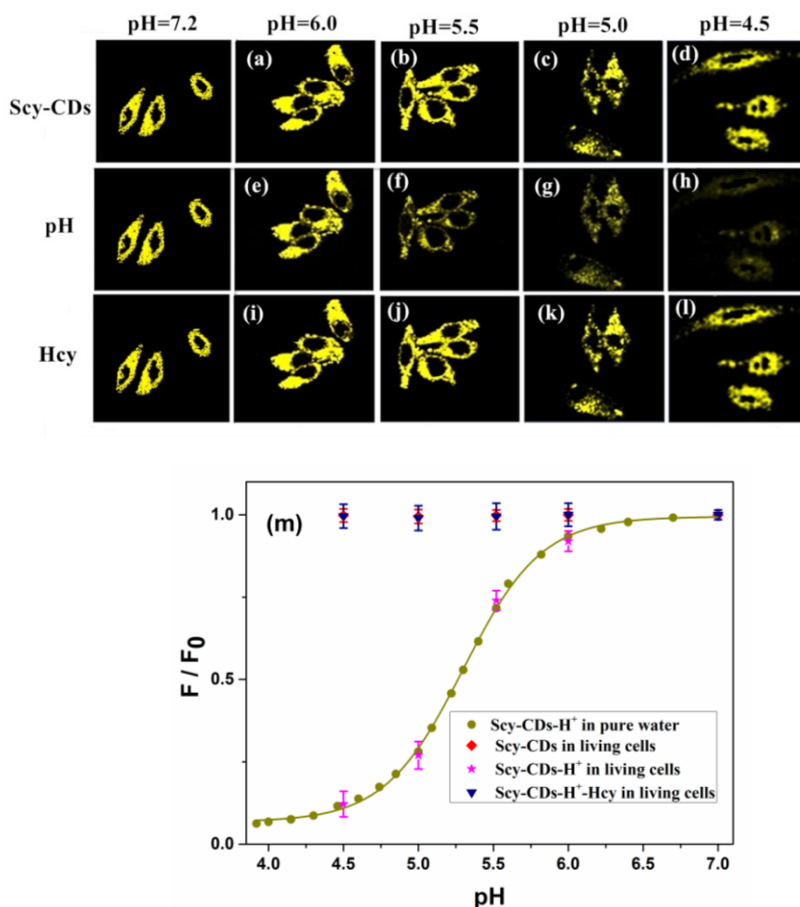

Fig. S16 HEp-2 cells at pH 7.2 as control group. (a)-(d) Confocal fluorescence images of 0.5 mg/mL Scy-CDs in HEp-2 cells at pH 7.2.(e)-(h) Followed by incubation with decreased pH (6.0, 5.5, 5.0 and 4.5, respectively) in high-K<sup>+</sup> buffered solutions for 30 min at 37 °C. (i)-(l) Further subsequent incubation with Hcy (50, 80, 105, 120 μM) for another hour at 37 °C. (m) Relatively mean fluorescence intensities of Scy-CDs in pure water and HEp-2 cells at different pH with absence or presence of Hcy (Data are presented as mean ± SD with replicates (n=3)).

#### 4. Synthesis of the styrylcyanine dye

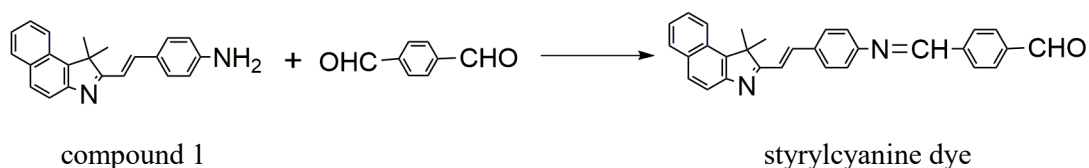

Compound 1 (laboratory-made, 1.24g, 3.97 mmol) and p-diformylbenzene (0.64g, 4.77mmol) were dissolved in 50 mL dry dichloromethane, The mixture solution was stirred and heated to reflux for 5 h. Finally, dichloromethane was removed on a rotary evaporator and the precipitate was purified by column chromatography using dichloromethane /ethyl acetate (3:1) as the eluent to obtain the orange solid styrylcyanine dye (1.37 g, 80.6 % yield). The <sup>1</sup>H NMR (600 MHz, CDCl<sub>3</sub>) data are δ 10.1 (s, -CHO, H), 8.48 (s, -CH, H), 8.46 (d, Ar-H, H), 8.43(d, Ar-H, 3H), 8.42 (d, Ar-H, H), 8.40 (d, Ar-H, 3H), 8.18 (d, Ar-H, 2H), 8.15 (d, -CH, H), 8.06 (t, Ar-H, H), 7.99 (t, Ar-H, H), 7.95 (d, Ar-H, 2H), 7.93 (d, -CH, H), and 1.47 (s, -CH<sub>3</sub>, 6H).

#### 5. <sup>1</sup>H NMR spectra

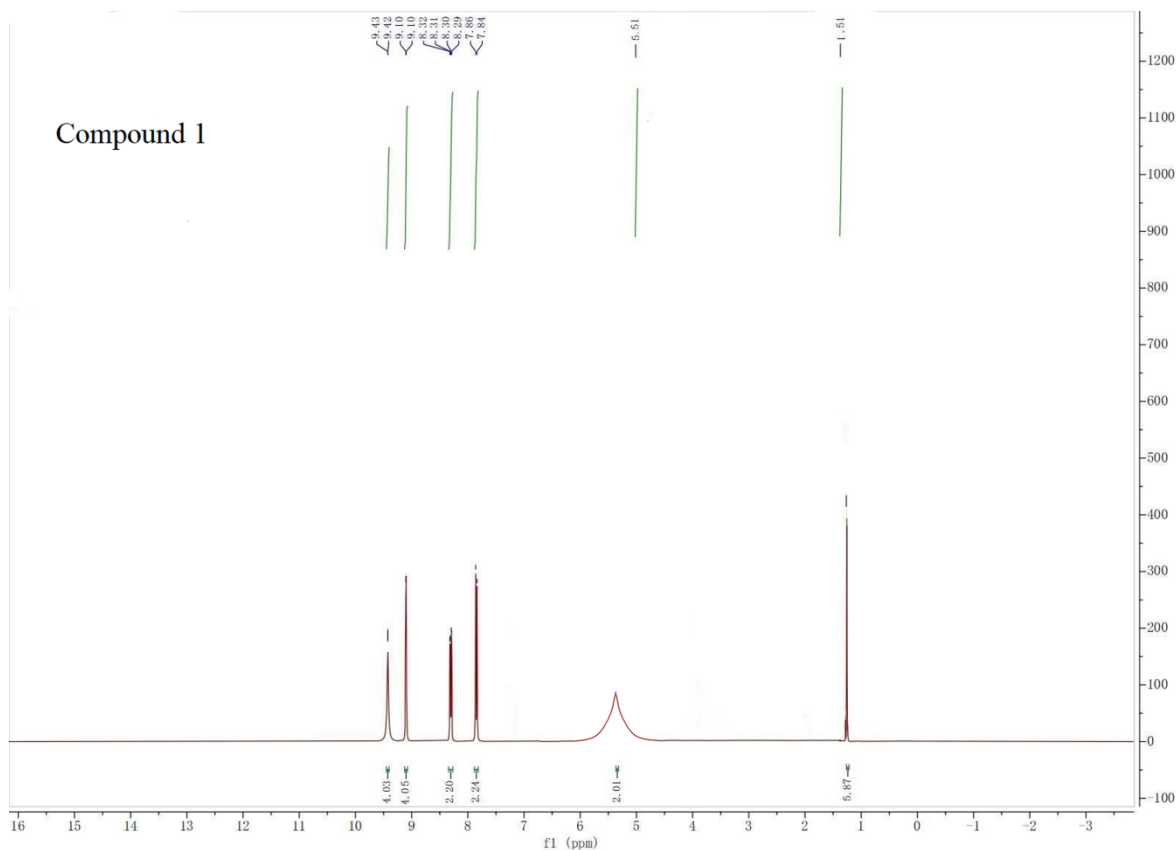

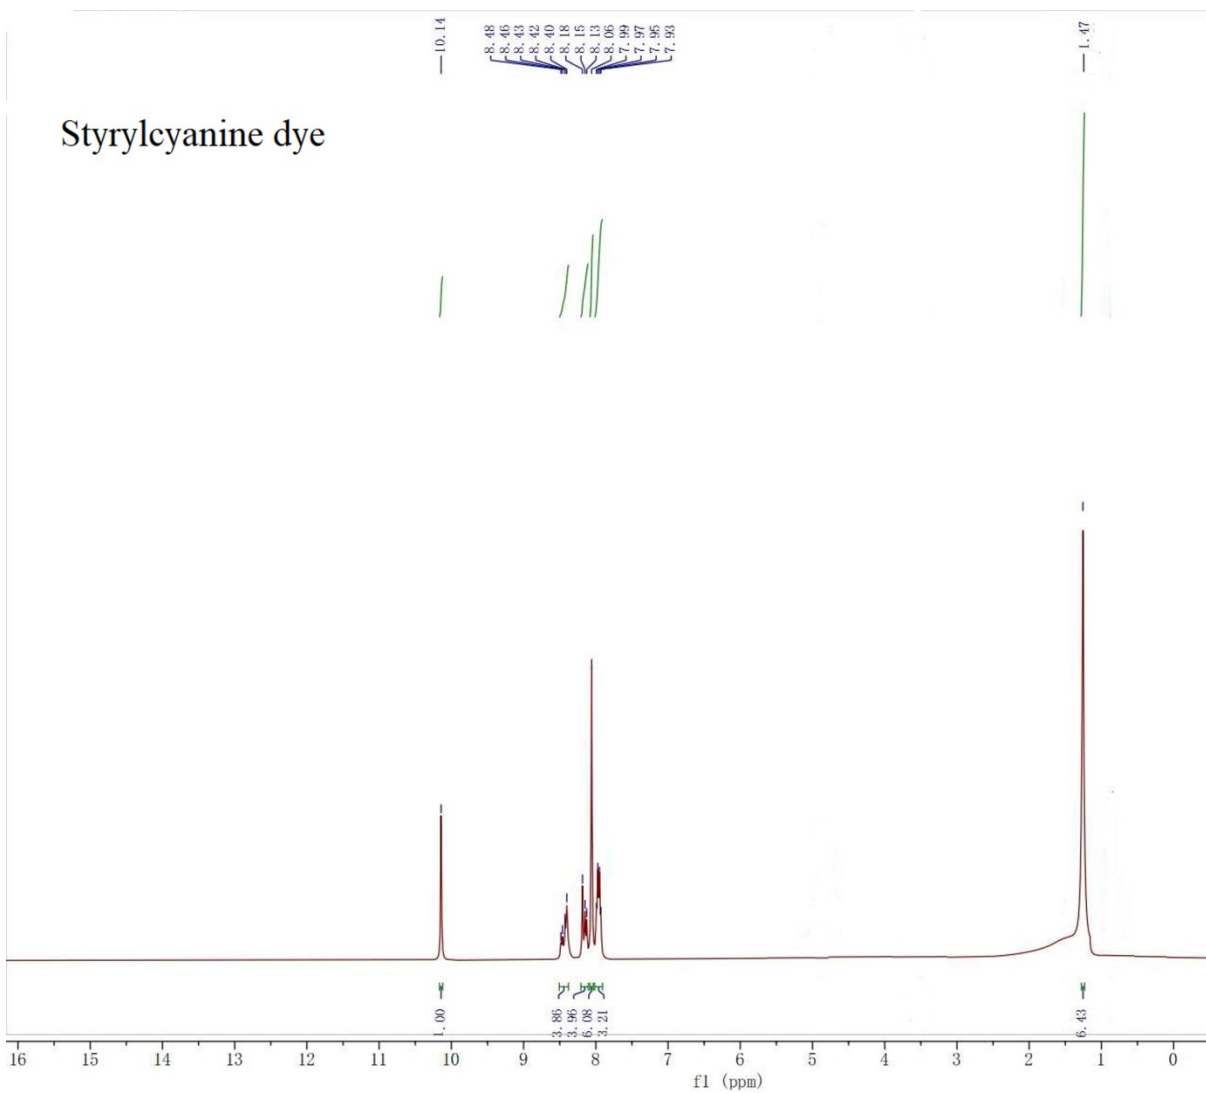

## 6. References

1. Zhang, M.; Gao, Y.; Li, M.; Yu, M.; Li, F.; Li, L.; Zhu, M.; Zhang, J.; Yi, T.; Huang, C. *Tetrahedron Lett.* **2007**, *48*, 3709-3712.
2. Qu, Z.; Zhou, X.; Gu, L.; Lan, R.; Sun, D.; Yu, D.; Shi, G. *Chem. Commun.*, **2013**, *49*, 9830-9832.
